# Supplementary material for: Porous polystyrene spheres loaded self nano-emulsifying systems of rosuvastatin calcium
Source: Royal Society of Chemistry journal article supplement (doi:10.1039/c5ra12045d), 2015-01-01
Supplement: c5ra12045d1.pdf [file c5ra12045d1.pdf]

## Supplementary Data

**Table 1 (a): Visual observations data made after addition of water for  $S_{mix}$  1:0**

| $S_{mix}$<br>1:0  | Aqueous |     |     |     |     |     |     |     |     |     |      |     |      |     |
|-------------------|---------|-----|-----|-----|-----|-----|-----|-----|-----|-----|------|-----|------|-----|
| OIL:<br>$S_{mix}$ | 0.1     | 0.2 | 0.3 | 0.4 | 0.5 | 0.6 | 0.7 | 0.8 | 0.9 | 1.0 | 1.25 | 1.5 | 1.75 | 2.0 |
| 1:1               | NE      | NE  | NE  | NG  | NE   | NE  | NE   | NE  |
| 1:2               | NE      | NE  | NE  | NE  | NE  | NE  | NE  | NE  | NE  | NG  | NG   | NG  | NG   | NG  |
| 1:3               | NE      | NE  | NE  | NE  | NE  | NE  | NE  | NE  | NE  | NE  | NE   | NE  | NE   | NE  |
| 1:4               | NG      | NE   | NE  | NE   | NE  |
| 1:5               | NG      | NE   | NE  | NE   | NE  |
| 1:6               | NE      | NG  | NE   | NE  | NE   | NE  |
| 1:7               | NG      | NG  | NE   | NE  | NE   | NE  |
| 1:8               | NG      | NE   | NE  | NE   | NE  |
| 1:9               | NG      | NG  | NG  | NE   | NE  | NE   | NE  |
| 2:1               | NG      | E   | E   | E   | E   | E   | E   | E   | E   | E   | E    | E   | E    | E   |

NG-Nanogel, EG-Emulgel, E-Emulsion, NE-Nanoemulsion

**Table 1 (b): Visual observations data made after addition of water for  $S_{mix}$  1:1**

| $S_{mix}$<br>1:1  | Aqueous |     |     |     |     |     |     |     |     |     |      |     |      |     |
|-------------------|---------|-----|-----|-----|-----|-----|-----|-----|-----|-----|------|-----|------|-----|
| OIL:<br>$S_{mix}$ | 0.1     | 0.2 | 0.3 | 0.4 | 0.5 | 0.6 | 0.7 | 0.8 | 0.9 | 1.0 | 1.25 | 1.5 | 1.75 | 2.0 |
| 1:1               | NE      | NE  | E   | E   | E   | E   | E   | E   | E   | E   | E    | E   | E    | E   |
| 1:2               | NE      | NE  | NE  | NE  | NE  | NE  | NE  | NE  | NE  | NE  | NE   | NE  | NE   | NE  |
| 1:3               | NE      | NE  | NE  | NE  | NE  | NE  | NE  | NE  | NE  | NE  | NE   | NE  | NE   | NE  |
| 1:4               | NE      | NE  | NE  | NE  | NE  | NE  | NE  | NE  | NE  | NE  | NE   | NE  | NE   | NE  |
| 1:5               | NE      | NE  | NE  | NE  | NE  | NE  | NE  | NE  | NE  | NE  | NE   | NE  | NE   | NE  |
| 1:6               | NE      | NE  | NE  | NE  | NE  | NE  | NE  | NE  | NE  | NE  | NE   | NE  | NE   | NE  |
| 1:7               | NE      | NE  | NE  | NE  | NE  | NE  | NE  | NE  | NE  | NE  | NE   | NE  | NE   | NE  |
| 1:8               | NE      | NE  | NE  | NE  | NE  | NE  | NE  | NE  | NE  | NE  | NE   | NE  | NE   | NE  |
| 1:9               | NE      | NE  | NE  | NE  | NE  | NE  | NE  | NE  | NE  | NE  | NE   | NE  | NE   | E   |
| 2:1               | E       | E   | E   | E   | E   | E   | E   | E   | E   | E   | E    | E   | E    | E   |

NG-Nanogel, EG-Emulgel, E-Emulsion, NE-Nanoemulsion

**Table 1 (c): Visual observations data made after addition of water for  $S_{mix}$  1:2**

| $S_{mix}$<br>1:2  | Aqueous |     |     |     |     |     |     |     |     |     |      |     |      |     |
|-------------------|---------|-----|-----|-----|-----|-----|-----|-----|-----|-----|------|-----|------|-----|
| OIL:<br>$S_{mix}$ | 0.1     | 0.2 | 0.3 | 0.4 | 0.5 | 0.6 | 0.7 | 0.8 | 0.9 | 1.0 | 1.25 | 1.5 | 1.75 | 2.0 |
| 1:1               | E       | E   | E   | E   | E   | E   | E   | E   | E   | E   | E    | E   | E    | E   |
| 1:2               | E       | E   | E   | E   | E   | E   | E   | E   | E   | E   | E    | E   | E    | E   |
| 1:3               | NE      | NE  | NE  | NE  | NE  | NE  | NE  | NE  | NE  | NE  | NE   | NE  | NE   | NE  |
| 1:4               | NE      | NE  | NE  | NE  | NE  | NE  | NE  | NE  | NE  | NE  | NE   | NE  | NE   | NE  |
| 1:5               | NE      | NE  | NE  | NE  | NE  | NE  | NE  | NE  | NE  | NE  | NE   | NE  | NE   | NE  |
| 1:6               | NE      | NE  | NE  | NE  | NE  | NE  | NE  | NE  | NE  | NE  | NE   | NE  | NE   | NE  |
| 1:7               | NE      | NE  | NE  | NE  | NE  | NE  | NE  | NE  | NE  | NE  | NE   | NE  | NE   | NE  |
| 1:8               | NE      | NE  | NE  | NE  | NE  | NE  | NE  | NE  | NE  | NE  | NE   | NE  | NE   | NE  |
| 1:9               | NE      | NE  | NE  | NE  | NE  | NE  | NE  | NE  | NE  | NE  | NE   | NE  | NE   | NE  |
| 2:1               | E       | E   | E   | E   | E   | E   | E   | E   | E   | E   | E    | E   | E    | E   |

NG-Nanogel, EG-Emulgel, E-Emulsion, NE-Nanoemulsion

**Table 1 (d): Visual observations data made after addition of water for  $S_{mix}$  1:3**

| $S_{mix}$<br>1:3  | Aqueous |     |     |     |     |     |     |     |     |     |      |     |      |     |
|-------------------|---------|-----|-----|-----|-----|-----|-----|-----|-----|-----|------|-----|------|-----|
| OIL:<br>$S_{mix}$ | 0.1     | 0.2 | 0.3 | 0.4 | 0.5 | 0.6 | 0.7 | 0.8 | 0.9 | 1.0 | 1.25 | 1.5 | 1.75 | 2.0 |
| 1:1               | E       | E   | E   | E   | E   | E   | E   | E   | E   | E   | E    | E   | E    | E   |
| 1:2               | E       | E   | E   | E   | E   | E   | E   | E   | E   | E   | E    | E   | E    | E   |
| 1:3               | NE      | NE  | NE  | NE  | NE  | E   | E   | E   | E   | E   | E    | E   | E    | E   |
| 1:4               | NE      | NE  | NE  | NE  | NE  | NE  | E   | E   | E   | E   | E    | E   | E    | E   |
| 1:5               | NE      | NE  | NE  | NE  | NE  | NE  | NE  | NE  | NE  | NE  | NE   | NE  | NE   | NE  |
| 1:6               | NE      | NE  | NE  | NE  | NE  | NE  | NE  | NE  | NE  | NE  | NE   | NE  | NE   | NE  |
| 1:7               | NE      | NE  | NE  | NE  | NE  | NE  | NE  | NE  | NE  | NE  | NE   | NE  | NE   | NE  |
| 1:8               | NE      | NE  | NE  | NE  | NE  | NE  | NE  | NE  | NE  | NE  | NE   | NE  | NE   | NE  |
| 1:9               | NE      | NE  | NE  | NE  | NE  | NE  | NE  | NE  | NE  | NE  | NE   | NE  | NE   | NE  |
| 2:1               | E       | E   | E   | E   | E   | E   | E   | E   | E   | E   | E    | E   | E    | E   |

NG-Nanogel, EG-Emulgel, E-Emulsion, NE-Nanoemulsion

**Table 1 (e): Visual observations data made after addition of water for  $S_{mix}$  1:4**

| $S_{mix}$<br>1:4  | Aqueous |     |     |     |     |     |     |     |     |     |      |     |      |     |
|-------------------|---------|-----|-----|-----|-----|-----|-----|-----|-----|-----|------|-----|------|-----|
| OIL:<br>$S_{mix}$ | 0.1     | 0.2 | 0.3 | 0.4 | 0.5 | 0.6 | 0.7 | 0.8 | 0.9 | 1.0 | 1.25 | 1.5 | 1.75 | 2.0 |
| 1:1               | E       | E   | E   | E   | E   | E   | E   | E   | E   | E   | E    | E   | E    | E   |
| 1:2               | NE      | E   | E   | E   | E   | E   | E   | E   | E   | E   | E    | E   | E    | E   |
| 1:3               | NE      | NE  | NE  | E   | E   | E   | E   | E   | E   | E   | E    | E   | E    | E   |
| 1:4               | NE      | NE  | NE  | NE  | E   | E   | E   | E   | E   | E   | E    | E   | E    | E   |
| 1:5               | NE      | NE  | NE  | NE  | E   | E   | E   | E   | E   | E   | E    | E   | E    | E   |
| 1:6               | NE      | NE  | NE  | NE  | E   | E   | E   | E   | E   | E   | E    | E   | E    | E   |
| 1:7               | NE      | NE  | NE  | NE  | E   | E   | E   | E   | E   | E   | E    | E   | E    | E   |
| 1:8               | NE      | NE  | NE  | NE  | E   | E   | E   | E   | E   | E   | E    | E   | E    | E   |
| 1:9               | NE      | NE  | NE  | NE  | E   | E   | E   | E   | E   | E   | E    | E   | E    | E   |
| 2:1               | NE      | E   | E   | E   | E   | E   | E   | E   | E   | E   | E    | E   | E    | E   |

NG-Nanogel, EG-Emulgel, E-Emulsion, NE-Nanoemulsion

**Table 1 (f): Visual observations data made after addition of water for  $S_{mix}$  2:1**

| $S_{mix}$<br>2:1  | Aqueous |     |     |     |     |     |     |     |     |     |      |     |      |     |
|-------------------|---------|-----|-----|-----|-----|-----|-----|-----|-----|-----|------|-----|------|-----|
| OIL:<br>$S_{mix}$ | 0.1     | 0.2 | 0.3 | 0.4 | 0.5 | 0.6 | 0.7 | 0.8 | 0.9 | 1.0 | 1.25 | 1.5 | 1.75 | 2.0 |
| 1:1               | NE      | NE  | NE  | NE  | NE  | NE  | NE  | NE  | NE  | NE  | E    | E   | E    | E   |
| 1:2               | NE      | NE  | NE  | NE  | NE  | NE  | NE  | NE  | NE  | NE  | E    | E   | E    | E   |
| 1:3               | NE      | NE  | NE  | NE  | NE  | NE  | NE  | NE  | NE  | NE  | NE   | NE  | NE   | NE  |
| 1:4               | NE      | NE  | NE  | NE  | NE  | NE  | NE  | NE  | NE  | NE  | NE   | NE  | NE   | NE  |
| 1:5               | NE      | NE  | NE  | NE  | NE  | NE  | NE  | NE  | NE  | NE  | NE   | NE  | NE   | NE  |
| 1:6               | NE      | NE  | NE  | NE  | NE  | NE  | NE  | NE  | NE  | NE  | NE   | NE  | NE   | NE  |
| 1:7               | NE      | NE  | NE  | NE  | NE  | NE  | NE  | NE  | NE  | NE  | NE   | NE  | NE   | NE  |
| 1:8               | NE      | NE  | NE  | NE  | NE  | NE  | NE  | NE  | NE  | NE  | NE   | NE  | NE   | NE  |
| 1:9               | NE      | NE  | NE  | NE  | NE  | NE  | NE  | NE  | NE  | NE  | NE   | NE  | NE   | NE  |
| 2:1               | E       | E   | E   | E   | E   | E   | E   | E   | E   | E   | E    | E   | E    | E   |

NG-Nanogel, EG-Emulgel, E-Emulsion, NE-Nanoemulsion

**Table 1 (g): Visual observations data made after addition of water for  $S_{mix}$  3:1**

| $S_{mix}$<br>3:1  | Aqueous |     |     |     |     |     |     |     |     |     |      |     |      |     |
|-------------------|---------|-----|-----|-----|-----|-----|-----|-----|-----|-----|------|-----|------|-----|
| OIL:<br>$S_{mix}$ | 0.1     | 0.2 | 0.3 | 0.4 | 0.5 | 0.6 | 0.7 | 0.8 | 0.9 | 1.0 | 1.25 | 1.5 | 1.75 | 2.0 |
| 1:1               | NE      | NE  | NE  | NE  | NE  | NE  | NE  | NE  | NG  | NG  | NG   | NG  | NG   | NG  |
| 1:2               | NE      | NE  | NE  | NE  | NE  | NE  | NE  | NE  | NE  | E   | E    | E   | E    | E   |
| 1:3               | NE      | NE  | NE  | NE  | NE  | NE  | NE  | NE  | NE  | NE  | NE   | NE  | NE   | NE  |
| 1:4               | NE      | NE  | NE  | NE  | NE  | NE  | NE  | NE  | NE  | NE  | NE   | NE  | NE   | NE  |
| 1:5               | NE      | NE  | NE  | NE  | NE  | NE  | NE  | NE  | NE  | NE  | NE   | NE  | NE   | NE  |
| 1:6               | NE      | NE  | NE  | NE  | NE  | NE  | NE  | NE  | NE  | NE  | NE   | NE  | NE   | NE  |
| 1:7               | NE      | NE  | NE  | NE  | NE  | NE  | NE  | NE  | NE  | NE  | NE   | NE  | NE   | NE  |
| 1:8               | NE      | NE  | NE  | NE  | NE  | NE  | NE  | NE  | NE  | NE  | NE   | NE  | NE   | NE  |
| 1:9               | NE      | NE  | NE  | NE  | NE  | NE  | NE  | NE  | NE  | NE  | NE   | NE  | NE   | NE  |
| 2:1               | NE      | E   | E   | E   | E   | E   | E   | E   | E   | E   | E    | E   | E    | E   |

NG-Nanogel, EG-Emulgel, E-Emulsion, NE-Nanoemulsion

**Table 1 (g): Visual observations data made after addition of water for  $S_{mix}$  4:1**

| $S_{mix}$<br>4:1  | Aqueous |     |     |     |     |     |     |     |     |     |      |     |      |     |
|-------------------|---------|-----|-----|-----|-----|-----|-----|-----|-----|-----|------|-----|------|-----|
| OIL:<br>$S_{mix}$ | 0.1     | 0.2 | 0.3 | 0.4 | 0.5 | 0.6 | 0.7 | 0.8 | 0.9 | 1.0 | 1.25 | 1.5 | 1.75 | 2.0 |
| 1:1               | E       | E   | NG  | NE  | NG   | NG  | NG   | NG  |
| 1:2               | NE      | NE  | NE  | NE  | NE  | NE  | NE  | NE  | E   | E   | E    | E   | E    | E   |
| 1:3               | NE      | NE  | NE  | NE  | NE  | NE  | NE  | NE  | NE  | NE  | NE   | NE  | NE   | NE  |
| 1:4               | NE      | NE  | NE  | NE  | NE  | NE  | NE  | NE  | NE  | NE  | NE   | NE  | NE   | NE  |
| 1:5               | NE      | NE  | NE  | NE  | NE  | NE  | NE  | NE  | NE  | NE  | NE   | NE  | NE   | NE  |
| 1:6               | NE      | NE  | NE  | NE  | NE  | NE  | NE  | NE  | NE  | NE  | NE   | NE  | NE   | NE  |
| 1:7               | NE      | NE  | NE  | NE  | NE  | NE  | NE  | NE  | NE  | NE  | NE   | NE  | NE   | NE  |
| 1:8               | NE      | NE  | NE  | NE  | NE  | NE  | NE  | NE  | NE  | NE  | NE   | NE  | NE   | NE  |
| 1:9               | NE      | NE  | NE  | NE  | NE  | NE  | NE  | NE  | NE  | NE  | NE   | NE  | NE   | NE  |
| 2:1               | E       | E   | E   | E   | E   | E   | E   | E   | E   | E   | E    | E   | E    | E   |

NG-Nanogel, EG-Emulgel, E-Emulsion, NE-Nanoemulsion

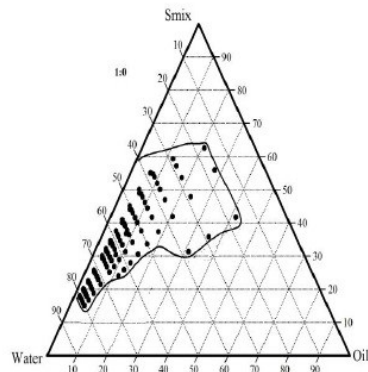

A: Smix 1:0

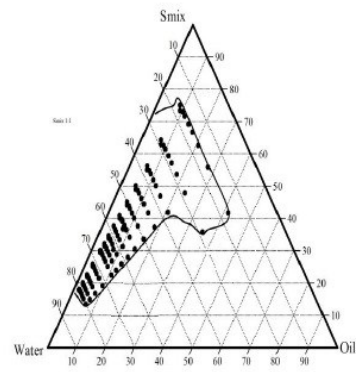

B: Smix 1:1

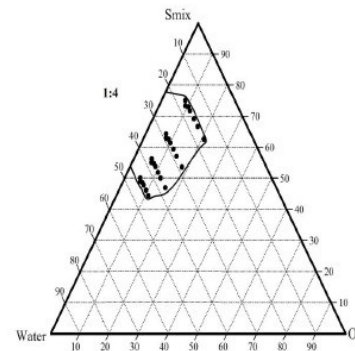

E: Smix 1:4

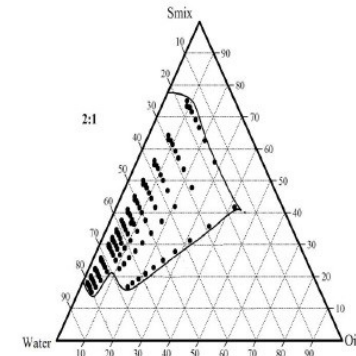

F: Smix 2:1

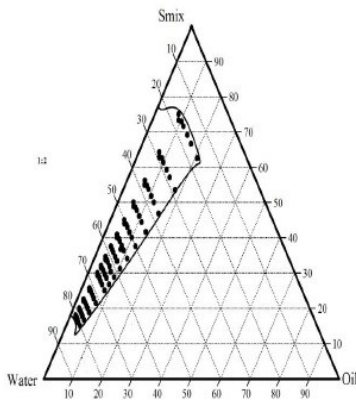

C: Smix 1:2

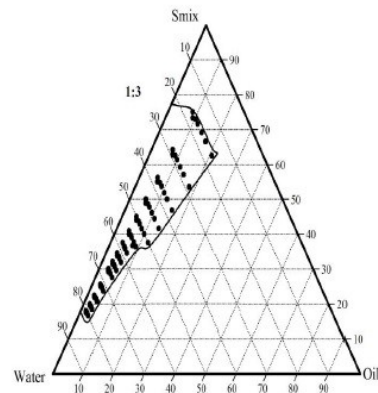

D: Smix 1:3

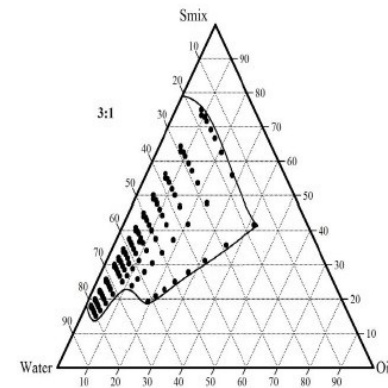

G: Smix 3:1

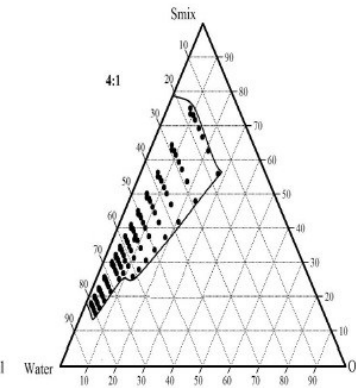

H: Smix 4:1

**Figure 1: Pseudo Ternary Phase Diagram of Rosuvastatin calcium at different  $S_{mix}$  ratio A) 1:0, B) 1:1, C) 1:2, D) 1:3, E) 1:4, F) 2:1, G) 3:1 and H) 4:1.**

**Table 2: Thermodynamic stability and dispersion test.**

| <b>Smix</b>      | <b>Oil</b> | <b>S<sub>mix</sub></b> | <b>Aqueous</b> | <b>Centrifuge</b> | <b>H/C Cycle</b> | <b>Freeze Thaw</b> | <b>Dispensability Grade</b> | <b>Inference</b> |
|------------------|------------|------------------------|----------------|-------------------|------------------|--------------------|-----------------------------|------------------|
| <b>1:0<br/>A</b> | 10         | 22                     | 68             | P                 | F                | P                  | A                           | F                |
|                  | 15         | 25                     | 60             | P                 | F                | P                  | B                           | F                |
|                  | 20         | 32                     | 48             | P                 | F                | F                  | B                           | F                |
|                  | 25         | 31                     | 44             | P                 | F                | F                  | A                           | F                |
|                  | 30         | 30                     | 40             | P                 | P                | F                  | C                           | F                |
|                  | 35         | 33                     | 32             | F                 | F                | F                  | B                           | F                |
|                  | 40         | 39                     | 21             | P                 | P                | F                  | A                           | F                |
| <b>1:1<br/>B</b> | 10         | 17                     | 73             | P                 | F                | P                  | A                           | F                |
|                  | 15         | 30                     | 55             | P                 | P                | P                  | A                           | F                |
|                  | <b>20</b>  | <b>40</b>              | <b>40</b>      | <b>P</b>          | <b>P</b>         | <b>P</b>           | <b>A</b>                    | <b>P</b>         |
|                  | 25         | 40                     | 35             | P                 | P                | P                  | B                           | F                |
|                  | 30         | 39                     | 31             | P                 | P                | P                  | D                           | F                |
|                  | 35         | 36                     | 29             | P                 | P                | F                  | D                           | F                |
|                  | 40         | 39                     | 21             | P                 | P                | P                  | D                           | F                |
| <b>1:2<br/>C</b> | 10         | 26                     | 64             | F                 | F                | F                  | A                           | F                |
|                  | 15         | 47                     | 38             | P                 | F                | P                  | B                           | F                |
|                  | 20         | 58                     | 22             | P                 | F                | P                  | A                           | F                |
| <b>1:3<br/>D</b> | 10         | 36                     | 54             | P                 | F                | F                  | B                           | F                |
|                  | 15         | 38                     | 47             | F                 | F                | P                  | A                           | F                |
|                  | <b>20</b>  | <b>56</b>              | <b>24</b>      | <b>P</b>          | <b>P</b>         | <b>p</b>           | <b>A</b>                    | <b>p</b>         |
| <b>1:4<br/>E</b> | 10         | 44                     | 46             | P                 | F                | F                  | B                           | F                |
|                  | 15         | 45                     | 40             | P                 | P                | P                  | C                           | F                |
|                  | 20         | 57                     | 23             | P                 | P                | F                  | C                           | F                |
| <b>2:1<br/>F</b> | 10         | 20                     | 70             | P                 | F                | P                  | B                           | F                |
|                  | 15         | 16                     | 69             | P                 | F                | P                  | B                           | F                |
|                  | 20         | 17                     | 63             | P                 | P                | F                  | A                           | F                |
|                  | <b>25</b>  | <b>22</b>              | <b>53</b>      | <b>P</b>          | <b>P</b>         | <b>P</b>           | <b>A</b>                    | <b>P</b>         |
|                  | <b>30</b>  | <b>28</b>              | <b>42</b>      | <b>P</b>          | <b>P</b>         | <b>P</b>           | <b>A</b>                    | <b>P</b>         |
|                  | 35         | 32                     | 33             | F                 | F                | P                  | D                           | F                |
|                  | 40         | 39                     | 21             | P                 | P                | F                  | A                           | F                |
| <b>3:1<br/>G</b> | 10         | 23                     | 67             | P                 | F                | P                  | A                           | F                |
|                  | 15         | 22                     | 63             | P                 | F                | F                  | B                           | F                |
|                  | 20         | 18                     | 62             | P                 | F                | P                  | B                           | F                |
|                  | 25         | 24                     | 51             | P                 | P                | F                  | A                           | F                |
|                  | <b>30</b>  | <b>29</b>              | <b>41</b>      | <b>P</b>          | <b>P</b>         | <b>P</b>           | <b>A</b>                    | <b>P</b>         |
|                  | 35         | 34                     | 31             | P                 | F                | F                  | D                           | F                |
|                  | 40         | 38                     | 22             | F                 | P                | P                  | D                           | F                |
| <b>4:1<br/>H</b> | 10         | 25                     | 65             | P                 | F                | P                  | A                           | F                |
|                  | 15         | 25                     | 60             | P                 | F                | P                  | C                           | F                |
|                  | 20         | 36                     | 24             | F                 | P                | F                  | D                           | F                |
|                  | 25         | 45                     | 30             | F                 | P                | F                  | D                           | F                |

**P- Pass, F-Fail and Dispensability grade system is discussed in Section**

**Table 3: Optimized formulations selected that passed thermodynamic stability test and dispersion test.**

| <b>Formulation Code</b> | <b>Smix ratio</b> | <b>Oil %</b> | <b>Surfactant %</b> | <b>Co-Surfactant %</b> | <b>Aqueous</b> |
|-------------------------|-------------------|--------------|---------------------|------------------------|----------------|
| <b>B20</b>              | 1:1               | 20           | 20                  | 20                     | 40             |
| <b>D20</b>              | 1:3               | 20           | 14                  | 42                     | 24             |
| <b>F25</b>              | 2:1               | 25           | 14.6                | 7.3                    | 53             |
| <b>F30</b>              | 2:1               | 30           | 18.6                | 9.3                    | 42             |
| <b>G30</b>              | 3:1               | 30           | 21.7                | 7.3                    | 41             |

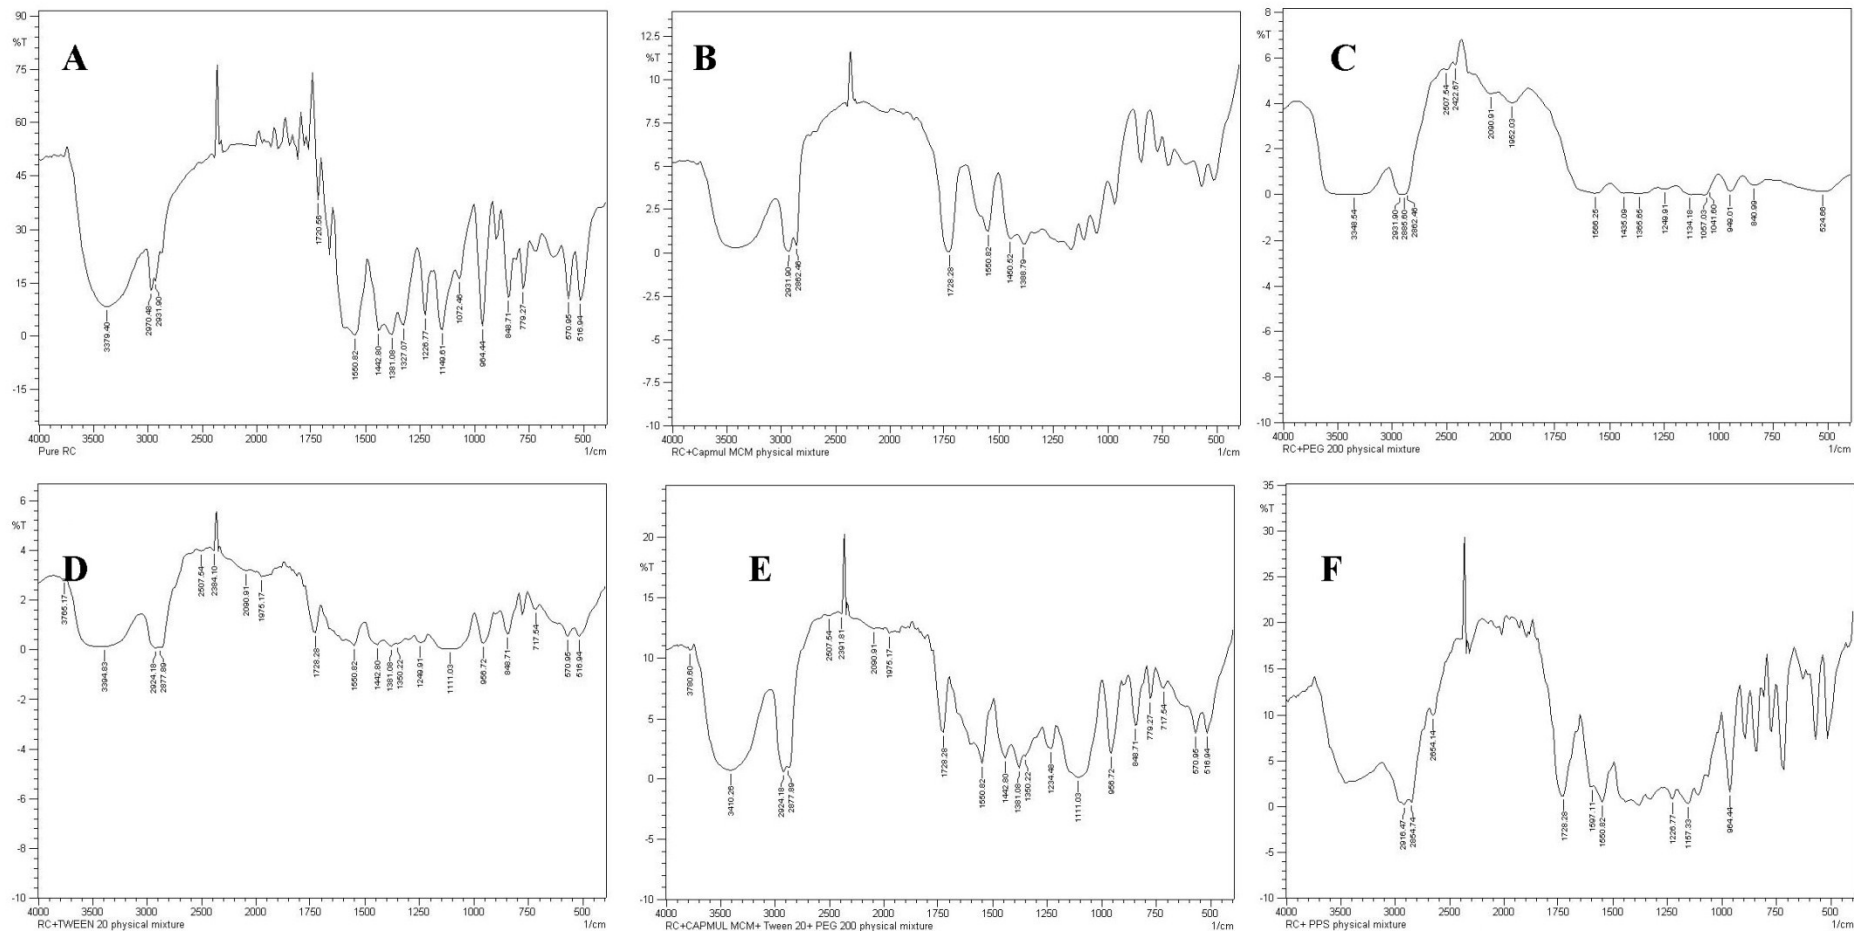

**Figure 2: IR spectra of A) Pure RC, B) RC and Capmul MCM physical mixture, C) RC and PEG 200 physical mixture, D) Rc and Tween 20 Physical mixture, E) RC, Capmul MCM, Tween 20 and PEG 200 physical mixture and F) RC and PPS physical Mixture.**



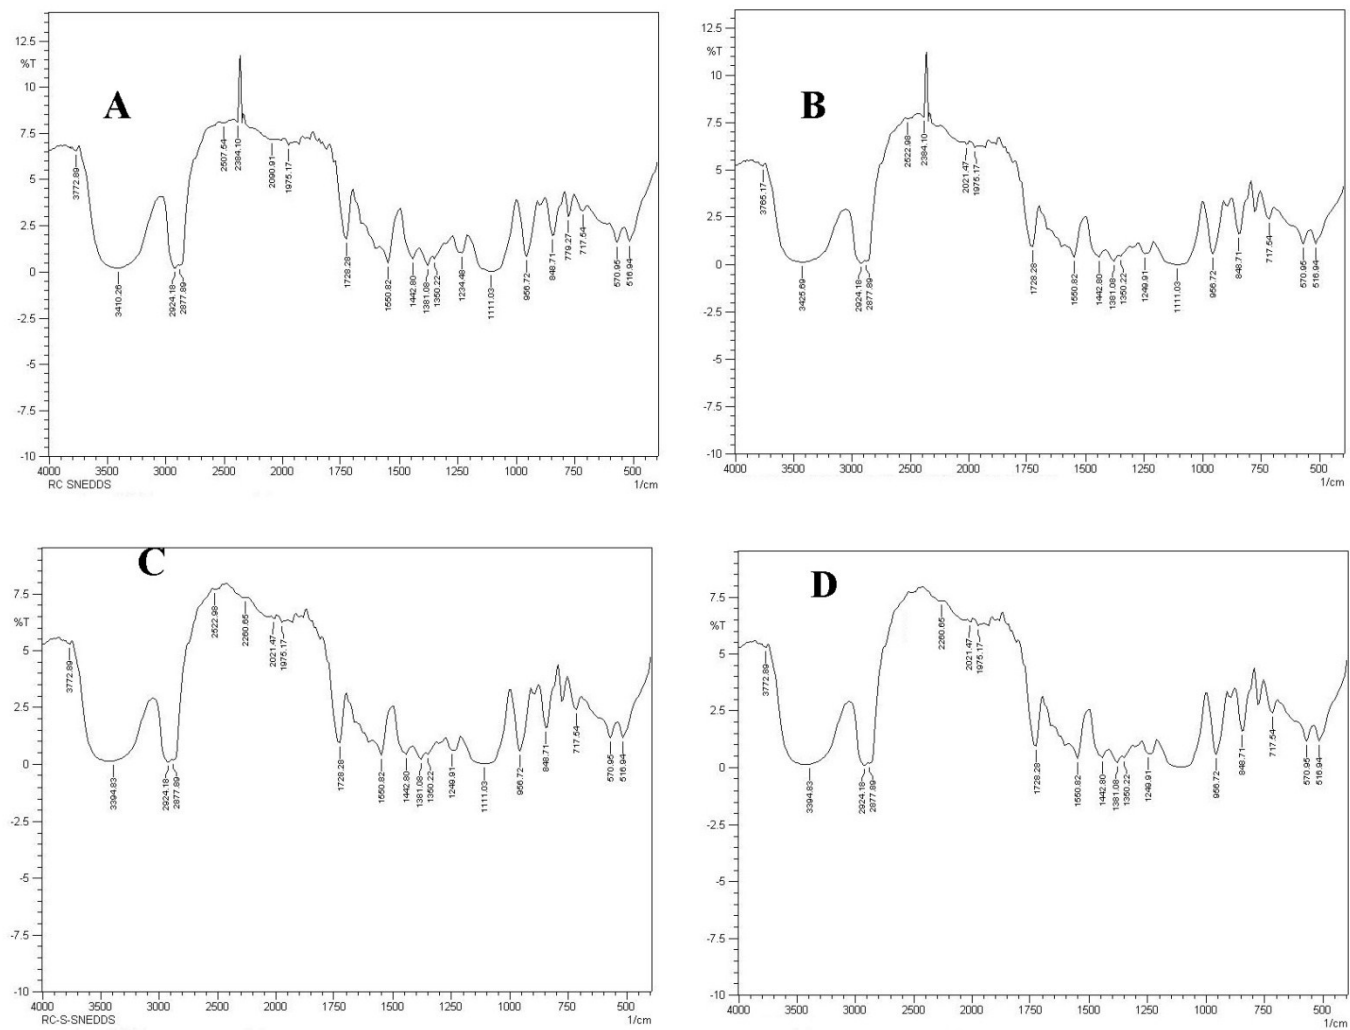

**Figure 3: IR spectra of A) RC SNEDDS, B) RC SNEDDS and PPS Physical mixture, C) RC loaded S-SNEDDS and 40°C and 75% relative humidity for 3 month.**
